# Supplementary material for: A phenomenological qualitative study of male-partners perspectives of maternity waiting homes in rural Ethiopia
Source: PubMed Central journal article supplement — Public Health Pract (Oxf). 2024 May 22;7:100513. doi: 10.1016/j.puhip.2024.100513 (PMC11153227; doi:10.1016/j.puhip.2024.100513), 2024-05-22
Supplement: mmc3.pdf [file mmc3.pdf]

## Research Checklist

The Consolidated Criteria for Reporting Qualitative Research (COREQ) checklist: a 32 checklist for interviews and focus groups of participants.

| Topic                                          | Item No. | Guiding Questions/Description                                                                                                                            | Reported on page no. |
|------------------------------------------------|----------|----------------------------------------------------------------------------------------------------------------------------------------------------------|----------------------|
| <b>Domain 1: Research team And reflexivity</b> |          |                                                                                                                                                          |                      |
| <i>Personal characteristics</i>                |          |                                                                                                                                                          |                      |
| Interviewer/facilitator                        | 1        | Which author/s conducted the interview or focus group?                                                                                                   | 5                    |
| Credentials                                    | 2        | What were the researcher's credentials? E.g. PhD, MD                                                                                                     | 5 – 6                |
| Occupation                                     | 3        | What was their occupation at the time of the study?                                                                                                      | 5 – 6                |
| Gender                                         | 4        | Was the researcher male or female?                                                                                                                       | 5                    |
| Experience and training                        | 5        | What experience or training did the researcher have?                                                                                                     | 5                    |
| <i>Relationship with participants</i>          |          |                                                                                                                                                          |                      |
| Relationship established                       | 6        | Was a relationship established prior to study commencement?                                                                                              | 5 – 6                |
| Participant knowledge of the interviewer       | 7        | What did the participants know about the researcher? e.g. personal goals, reasons for doing the research                                                 | 5 – 6                |
| Interviewer characteristics                    | 8        | What characteristics were reported about the interviewer/facilitator? e.g. Bias, assumptions, reasons and interests in the research topic                | 5 – 6                |
| <b>Domain 2: Study design</b>                  |          |                                                                                                                                                          |                      |
| <i>Theoretical framework</i>                   |          |                                                                                                                                                          |                      |
| Methodological orientation and Theory          | 9        | What methodological orientation was stated to underpin the study? e.g. grounded theory, discourse analysis, ethnography, phenomenology, content analysis | 4                    |
| <i>Participant selection</i>                   |          |                                                                                                                                                          |                      |
| <b>Sampling</b>                                | 10       | How were the participants selected? e.g. purposive, convenience, consecutive, snowball                                                                   | 4                    |
| Method of approach                             | 11       | How were participants approached? e.g. face-to-face, telephone, mail, email                                                                              | 5                    |
| Sample size                                    | 12       | How many participants were in the study?                                                                                                                 | 5                    |
| Non-participation                              | 13       | How many people refused to participate or dropped out? Reasons?                                                                                          | 5                    |
| <i>Setting</i>                                 |          |                                                                                                                                                          |                      |
| Setting of data collection                     | 14       | Where was the data collected? e.g. home, clinic, workplace                                                                                               | 5                    |
| Presence of non-participants                   | 15       | Was anyone else present besides the participants and researchers?                                                                                        | 5                    |

|                       |    |                                                                                   |       |
|-----------------------|----|-----------------------------------------------------------------------------------|-------|
| Description of sample | 16 | What are the important characteristics of the sample? e.g. demographic data, date | 6 – 7 |
|-----------------------|----|-----------------------------------------------------------------------------------|-------|

The Consolidated Criteria for Reporting Qualitative Research checklist: a 32 checklist for interviews and focus groups of participants (**continued**).

| <b>Topic</b>                           | <b>Item No.</b> | <b>Guide Questions/Description</b>                                                                                              | <b>Reported on page no.</b> |
|----------------------------------------|-----------------|---------------------------------------------------------------------------------------------------------------------------------|-----------------------------|
| Data collection                        |                 |                                                                                                                                 |                             |
| Interview guide                        | 17              | Were questions, prompts, guides provided by the authors? Was it pilot tested?                                                   | 5 + additional file 1 & 2   |
| Repeat interviews                      | 18              | Were repeats inter views carried out? If yes, how many?                                                                         | No                          |
| Audio/visual recording                 | 19              | Did the research use audio or visual recording to collect the data?                                                             | 5                           |
| Field notes                            | 20              | Were field notes made during and/or after the interview or focus group?                                                         | 5                           |
| Duration                               | 21              | What was the duration of the interviews or focus group?                                                                         | 5                           |
| Data saturation                        | 22              | Was data saturation discussed?                                                                                                  | 4 – 5                       |
| Transcripts returned                   | 23              | Were transcripts returned to participants for comment and/or correction?                                                        | No                          |
| <b>Domain 3: analysis and findings</b> |                 |                                                                                                                                 |                             |
| <i>Data analysis</i>                   |                 |                                                                                                                                 |                             |
| Number of data coders                  | 24              | How many data coders coded the data?                                                                                            | 6                           |
| Description of the coding tree         | 25              | Did authors provide a description of the coding tree?                                                                           | 6                           |
| Derivation of themes                   | 26              | Were themes identified in advance or derived from the data?                                                                     | 6                           |
| Software                               | 27              | What software, if applicable, was used to manage the data?                                                                      | 6                           |
| Participant checking                   | 28              | Did participants provide feedback on the findings?                                                                              | No                          |
| <i>Reporting</i>                       |                 |                                                                                                                                 |                             |
| Quotations presented                   | 29              | Were participant quotations presented to illustrate the themes/findings? Was each quotation identified? e.g. participant number | 8 – 13                      |
| Data and findings consistent           | 30              | Was there consistency between the data presented and the findings?                                                              | 8 – 13                      |
| Clarity of major themes                | 31              | Were major themes clearly presented in the findings?                                                                            | 8 – 13                      |
| Clarity of minor themes                | 32              | Is there a description of diverse cases or discussion of minor themes?                                                          | No                          |
